# Supplementary material for: Atomic Structure and Biochemical Characterization of an RNA Endonuclease in the N Terminus of Andes Virus L Protein
Source: PubMed Central journal article supplement (PMC4907427; doi:10.1371/journal.ppat.1005635), 2016-06-14

S3 Figure

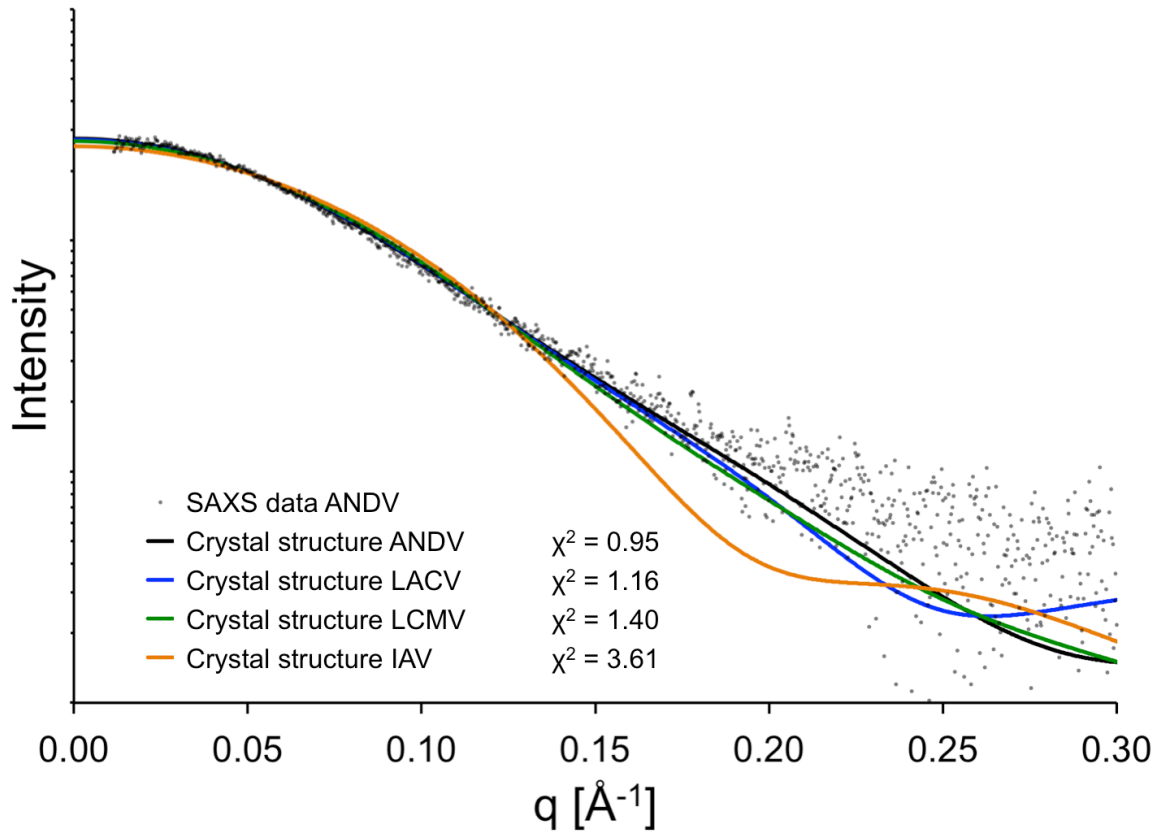

Supplement: ppat.1005635.s003.pdf [file ppat.1005635.s003.pdf]
