# Supplementary material for: Atomic Structure and Biochemical Characterization of an RNA Endonuclease in the N Terminus of Andes Virus L Protein
Source: PubMed Central journal article supplement (PMC4907427; doi:10.1371/journal.ppat.1005635), 2016-06-14
Supplement: ppat.1005635.s005.pdf [file ppat.1005635.s005.pdf]

**S1 Table. Crystallographic data collection and refinement statistics**

|                                                            | ANDV L <sub>1-200</sub> K127A anomalous | ANDV L <sub>1-200</sub> K127A native |
|------------------------------------------------------------|-----------------------------------------|--------------------------------------|
| <b>Data collection</b>                                     |                                         |                                      |
| Space group                                                | P 42 <sub>1</sub> 2                     | P 42 <sub>1</sub> 2                  |
| Cell dimensions (Å/°)                                      | a=b=82.9; c=79.3<br>α=β=γ=90°           | a=b=82.9; c=79.3<br>α=β=γ=90°        |
| Wavelength (Å)                                             | 1.77                                    | 0.984                                |
| Resolution range (Å)                                       | 79.31 – 2.80 (2.87 – 2.80)              | 79.31 – 2.40 (2.46 – 2.40)           |
| Completeness (%) <sup>1</sup>                              | 99.88 (100)                             | 99.3 (99.6)                          |
| Observed reflections                                       | 93605 (18108)                           | 84120 (18266)                        |
| Unique reflections                                         | 13170 (2446)                            | 20577 (4391)                         |
| Redundancy <sup>1</sup>                                    | 7.1 (7.4)                               | 4.1 (4.2)                            |
| R <sub>merge</sub> (%) <sup>1</sup>                        | 10.9 (126.9)                            | 4.9 (98.0)                           |
| Mean I/σ <sup>1</sup>                                      | 14.2 (1.8)                              | 19.3 (2.1)                           |
| Wilson B-factor                                            | 59.74                                   | 52.16                                |
| <b>Refinement statistics</b>                               |                                         |                                      |
| R <sub>work</sub> (%) / R <sub>free</sub> (%) <sup>2</sup> |                                         | 20.8/26.2 (38.2/42.5)                |
| Average B-factor (Å <sup>2</sup> )                         |                                         | 72.4                                 |
| Protein                                                    |                                         | 72.6                                 |
| Ligand                                                     |                                         | 74.0                                 |
| Solvent                                                    |                                         | 67.7                                 |
| Number of atoms                                            |                                         | 1672                                 |
| Protein                                                    |                                         | 1617                                 |
| Ligand                                                     |                                         | 12                                   |
| Water molecules                                            |                                         | 42                                   |
| RMSD bond lengths                                          |                                         | 0.01                                 |
| RMSD bond angles                                           |                                         | 1.44                                 |
| Ramachandran favored (%)                                   |                                         | 93                                   |
| Ramachandran outliers (%)                                  |                                         | 0                                    |
| PDB ID                                                     |                                         | 5HSB                                 |

<sup>1</sup> Values in parentheses are for the highest resolution shell.

<sup>2</sup> R<sub>free</sub> is the cross-validation R factor for 10% of reflections against which the model was not refined.
